# Supplementary material
Source: Springer Nature journal article supplement (https://www.springermedizin.de/resource/supplementary/13063_2010_614_MOESM5_ESM.pdf/9618872)
Supplement: MOESM5 [file 9618872]

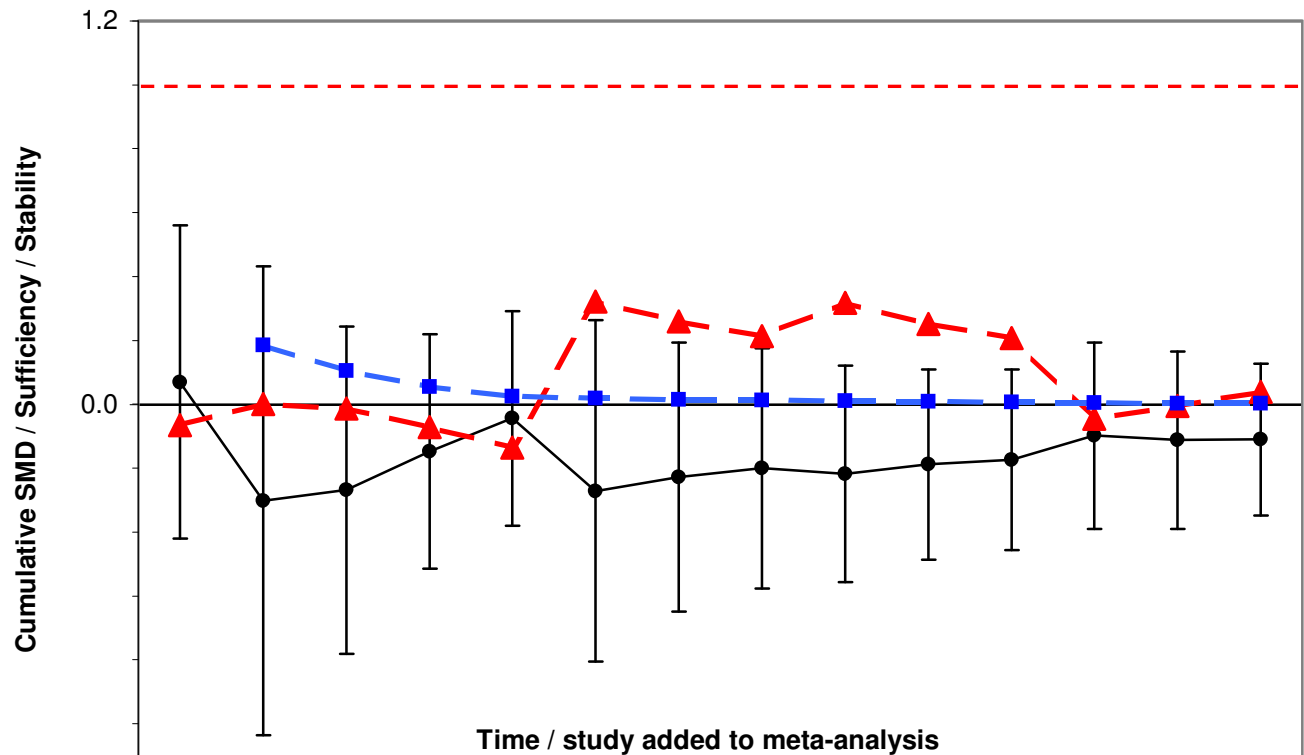

|                             | 1985<br>DeBusk-<br>Brief | 1985<br>DeBusk-<br>Extende | 1993<br>Sparks | 1998<br>Bell | 2000<br>Carlson | 2000<br>Kassaia<br>n | 2002<br>Arthur | 2002<br>Gordon-<br>Comm | 2002<br>Gordon-<br>Sup | 2003<br>Marcion<br>ni | 2005<br>Daskap<br>an | 2006<br>Dalal | 2006<br>Wu | 2007<br>BRUM |
|-----------------------------|--------------------------|----------------------------|----------------|--------------|-----------------|----------------------|----------------|-------------------------|------------------------|-----------------------|----------------------|---------------|------------|--------------|
| —●— Cumulative SMD & 95% CI | 0.07                     | -0.30                      | -0.27          | -0.15        | -0.04           | -0.27                | -0.23          | -0.20                   | -0.22                  | -0.19                 | -0.17                | -0.10         | -0.11      | -0.11        |
| —▲— Sufficiency             | -0.065                   | 0.001                      | -0.013         | -0.071       | -0.136          | 0.321                | 0.259          | 0.213                   | 0.319                  | 0.251                 | 0.207                | -0.045        | -0.005     | 0.039        |
| —■— Stability               |                          | 0.185                      | 0.105          | 0.056        | 0.026           | 0.019                | 0.015          | 0.013                   | 0.011                  | 0.009                 | 0.008                | 0.006         | 0.004      | 0.003        |
